# Supplementary material for: Observational study on the prognostic value of testosterone and adiposity in postmenopausal estrogen receptor positive breast cancer patients
Source: Springer Nature journal article supplement (doi:10.1186/s12885-018-4558-4), 2018-06-12

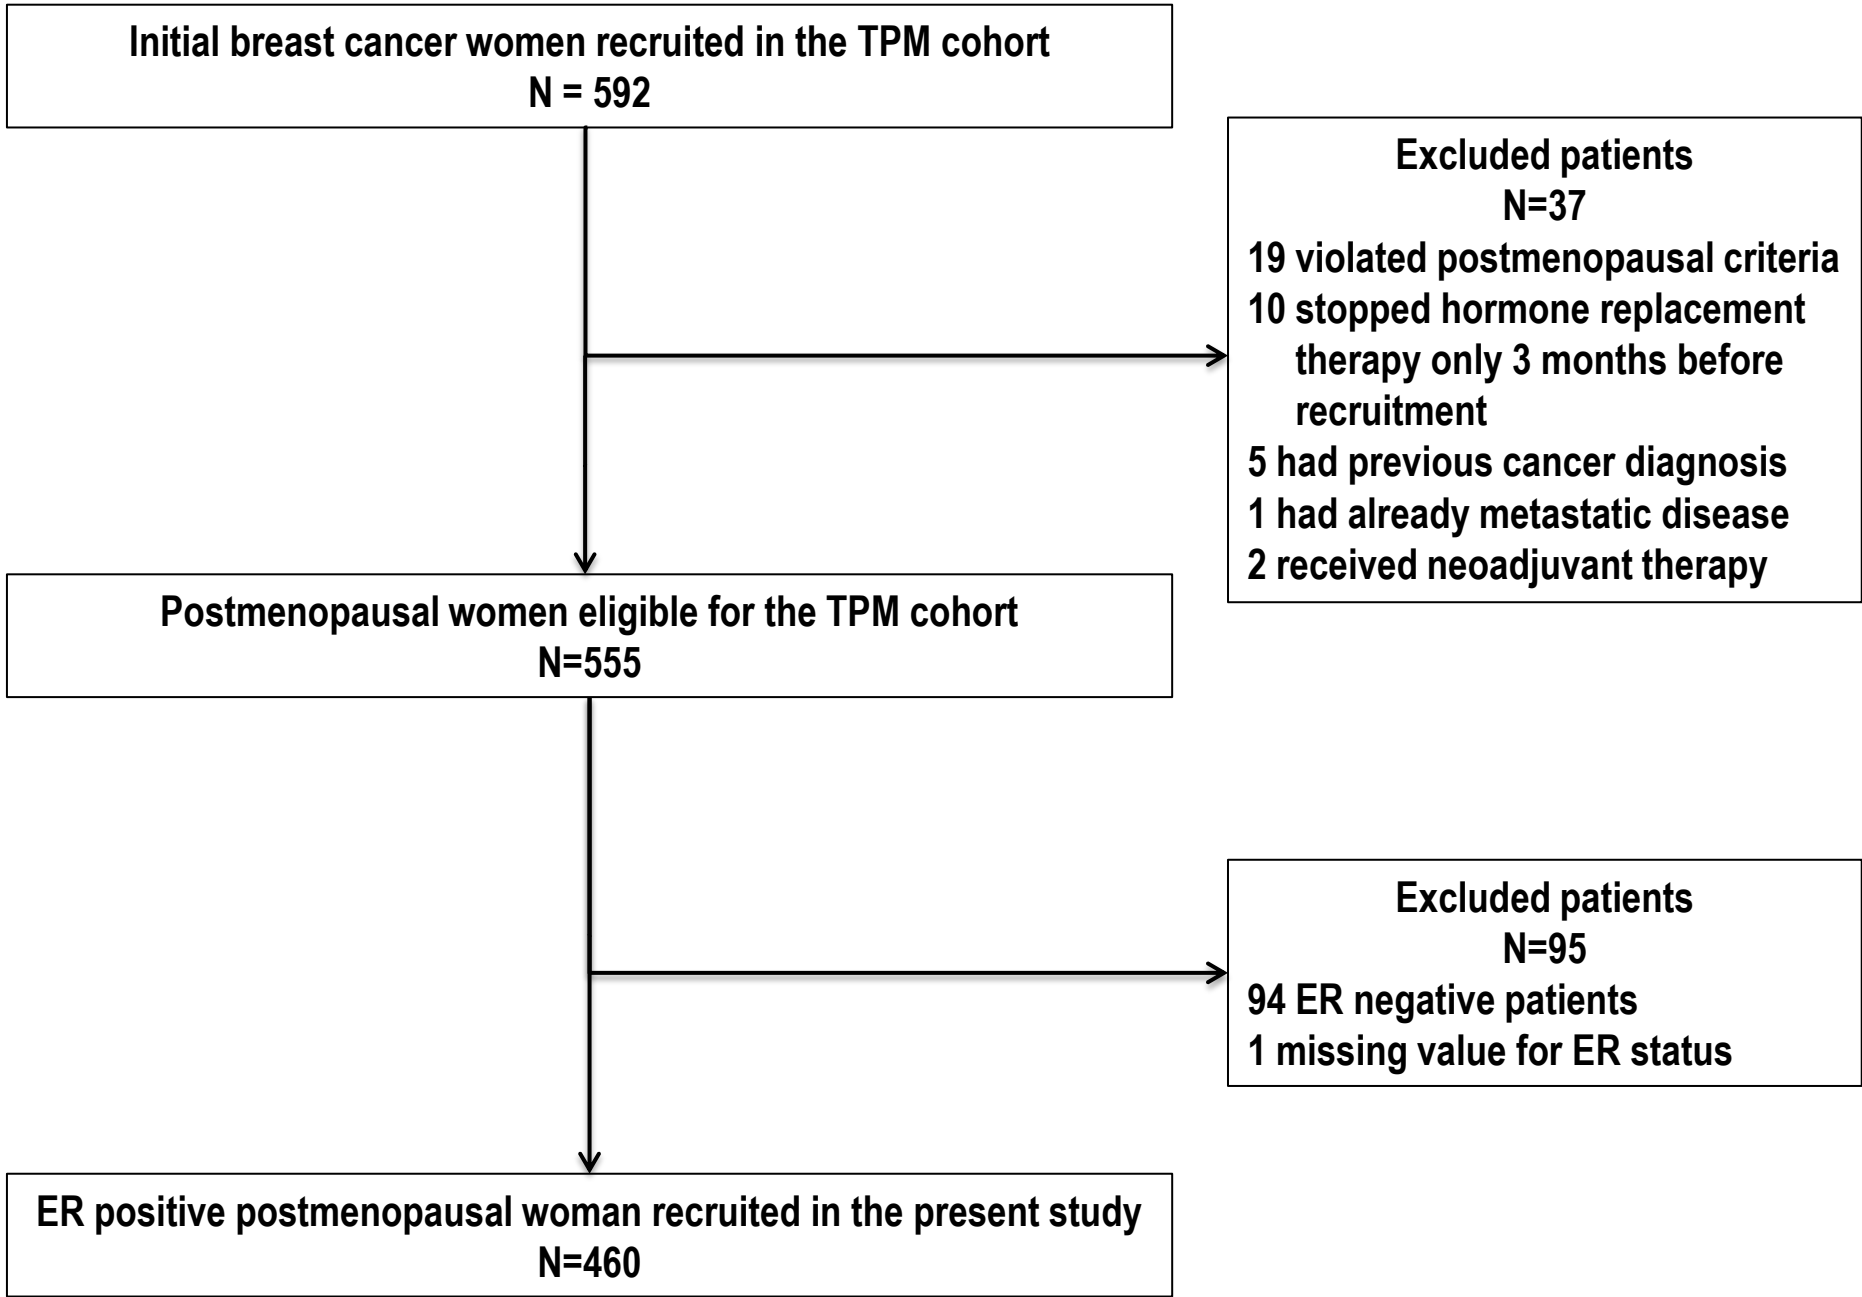

Supplement: MOESM1 [file 15843118]
